# Supplementary material for: Highly dispersed buckybowls as model carbocatalysts for C–H bond activation
Source: Royal Society of Chemistry journal article supplement (doi:10.1039/c5ta00898k), 2015-01-01
Supplement: c5ta00898k1.pdf [file c5ta00898k1.pdf]

## **Highly dispersed Buckybowls as model carbocatalysts for C-H bond activation**

**I. Ilgaz Soykal, Hui Wang, Jewook Park, An-Ping Li, Chengdu Liang\* and Viviane Schwartz\*,**

Center for Nanophase Materials Sciences; Oak Ridge National Laboratory, Oak Ridge, TN 37831. Schwartz V.: Tel: 01-865-576-6749, E-mail: [schwartzv@ornl.gov](mailto:schwartzv@ornl.gov) ; Liang C.D.: Tel: 01-865-576-1080, E-mail: [liangcn@ornl.gov](mailto:liangcn@ornl.gov)

**KEYWORDS:** Fullerene, C<sub>60</sub>, Oxidative dehydrogenation, isobutane, cage unzipping

Notice: This submission was sponsored by a contractor of the United States Government under contract DE-AC05-00OR22725 with the United States Department of Energy. The United States Government retains, and the publisher, by accepting this submission for publication, acknowledges that the United States Government retains, a nonexclusive, paid-up, irrevocable, worldwide license to publish or reproduce the published form of this submission, or allow others to do so, for United States Government purposes.

## Supplementary Information

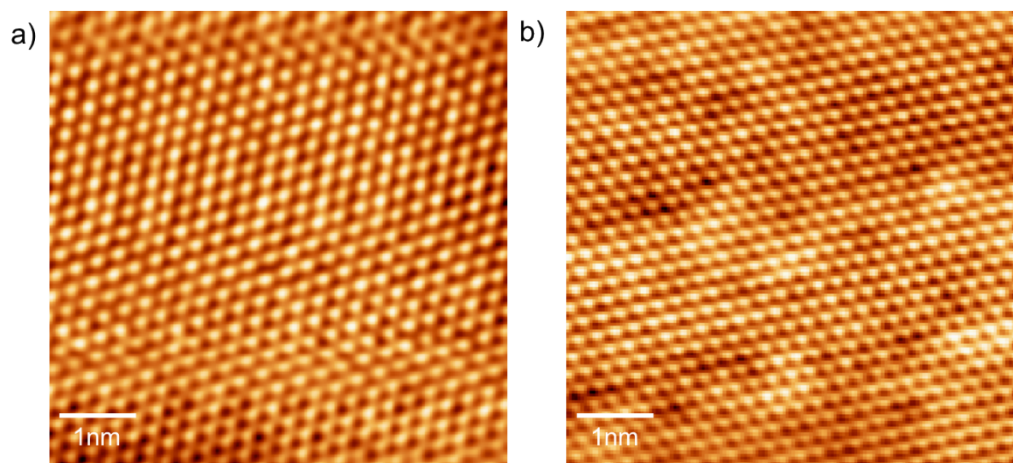

**Supplementary Figure S1.** STM imaging of the pure HOPG surface before a) and after b) oxidation treatment.

To verify cleanliness of the *ex situ* oxidation procedure, we carried out the same oxidation process to the bare HOPG substrate. Figure S1a and b ( $6 \times 6 \text{ nm}^2$ ,  $V_t = 0.6 \text{ V}$  (A) and  $0.8 \text{ V}$  (B),  $I_t = 400 \text{ pA}$ ) show atomically resolved STM topography images of HOPG substrate both before and after oxidation process, respectively. Oxidation pretreatment had no effect on the HOPG substrate.

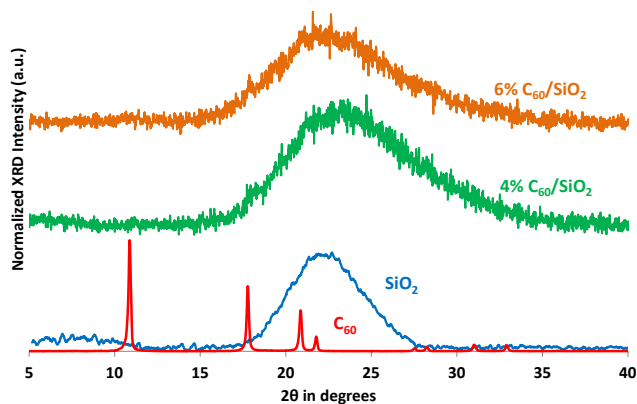

**Supplementary Figure S2.** X-ray diffraction patterns for pure  $\text{C}_{60}$ ,  $\text{SiO}_2$ , 4%  $\text{C}_{60}/\text{SiO}_2$  and 6%  $\text{C}_{60}/\text{SiO}_2$

Supplementary Figure S2. shows the XRD patterns for pure fullerene, silica, as well as the synthesized catalysts. Pure fullerene shows strong peaks at  $10.9^\circ$ ,  $17.8^\circ$ ,  $20.9^\circ$  and  $21.8^\circ$  which correspond to (111), (220), (311) and (222) planes, respectively according to the reference ICDD 04-007-2472. Mesoporous silica only shows the broad  $15\text{--}30^\circ$  band typical for amorphous  $\text{SiO}_2$ .
